# Supplementary material
Source: PubMed Central journal article supplement (PMC4807514)
Supplement: AEM.03887-15_zam999117045so1.pdf [file AEM.03887-15_zam999117045so1.pdf]

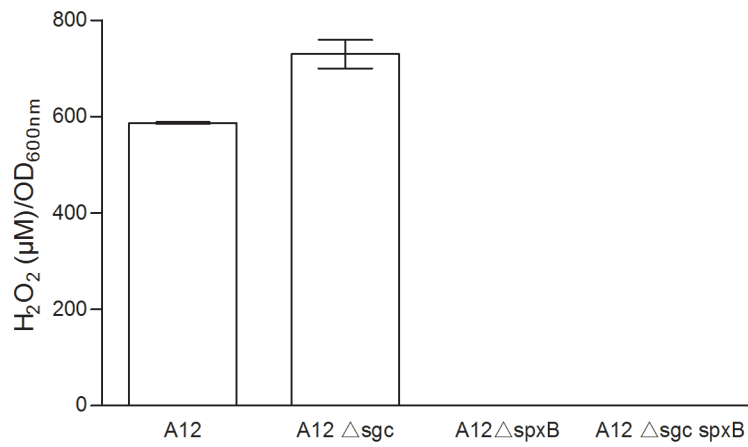

**Figure S1.** H<sub>2</sub>O<sub>2</sub> production during growth of A12 WT, A12Δ*sgc*, A12Δ*spxB*, and A12Δ*sgc spxB* in BHI broth. The cultures were grown to OD<sub>600</sub> = 0.3 and then shaken at 200 RPM for 30 min. H<sub>2</sub>O<sub>2</sub> concentration in the supernatant fluids was determined and normalized to OD<sub>600</sub>.

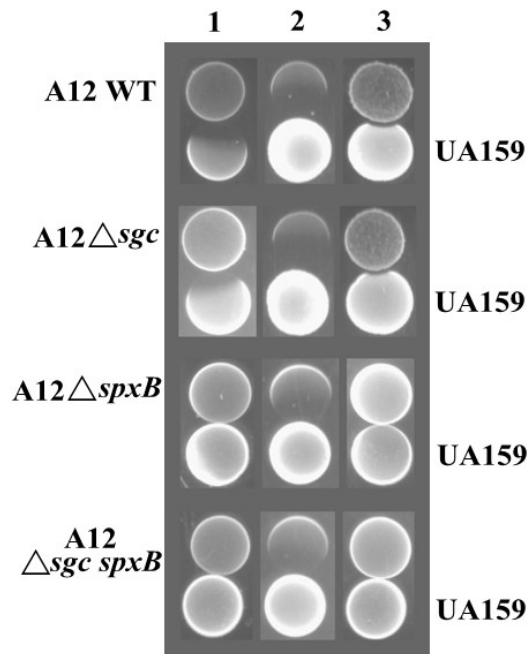

**Figure S2.** Competition between *S. mutans* UA159 and A12 WT, A12 $\Delta$ sgc, A12 $\Delta$ spxB, and A12 $\Delta$ sgc spxB on half-strength BHI agar plates. (1) The A12 strains were inoculated first, followed by inoculation of *S. mutans* 24 h later and an additional 24 h of incubation; (2) *S. mutans* was inoculated first, followed by inoculation of the A12 strains 24 h later, then an additional 24 h of incubation; and (3) A12 strains and *S. mutans* were inoculated at the same time and incubated for a total of 24 h.

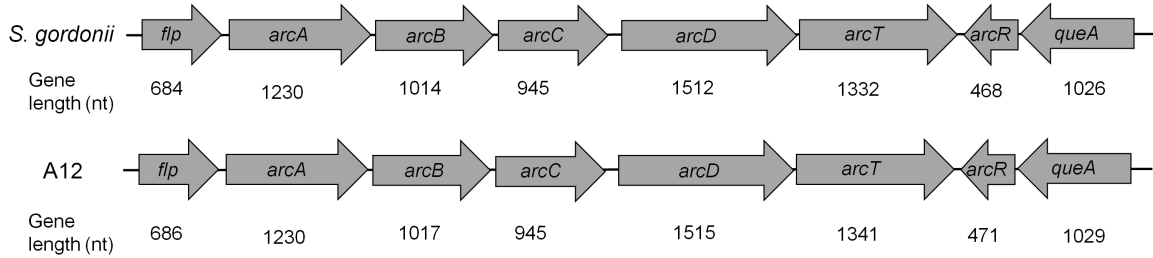

|                | Flp | ArcA | ArcB | ArcC | ArcD | ArcT | ArcR | QueA |
|----------------|-----|------|------|------|------|------|------|------|
| Identity (%)   | 63  | 97   | 99   | 97   | 78   | 75   | 83   | 85   |
| Similarity (%) | 82  | 98   | 99   | 99   | 86   | 85   | 92   | 92   |

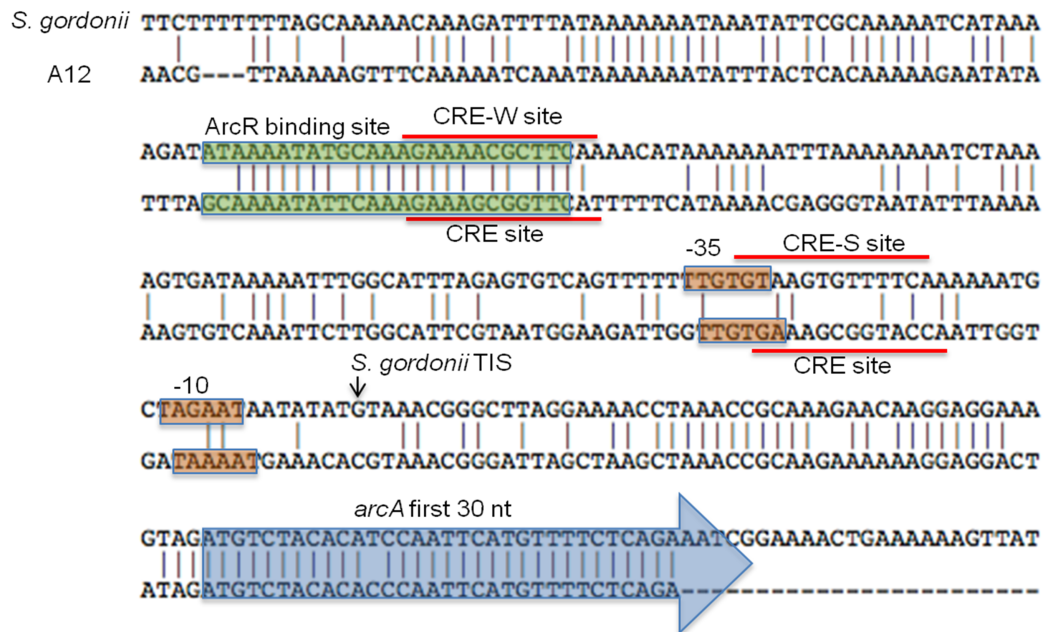

**Figure S3. (A)** Schematic diagram of the ADS operons and flanking genes in *S. gordonii* DL1 and A12. **(B)** Sequence alignments and predicted functional *cis*-acting elements of the *S. gordonii* (top) and A12 (bottom) *arcA* promoter regions. The start codon for *arcA* and the first 30 bases of the structural gene are highlighted in blue. The *S. gordonii* transcriptional initiation site (TIS) was mapped previously by primer extension. The promoter (-35, -10) elements are highlighted in orange, as are putative CcpA binding (CRE, red lines) and ArcR binding (green highlights) sites.

**Table S1. Genome sequence details**

| <b>Species</b>                                          | <b>Source</b> | <b>Tissue/presentation</b> | <b>Accession #</b> |
|---------------------------------------------------------|---------------|----------------------------|--------------------|
| <i>S. anginosus</i> (1 2 62CV)                          | human         | rectal biopsy              | ADME01             |
| <i>S. australis</i> (ATCC 700641)                       | human         | saliva                     | AEQR01             |
| <i>S. constellatus</i> subsp. <i>pharyngis</i> (SK1060) | human         | throat                     | AFUP01             |
| <i>S. cristatus</i> ATCC 51100                          | human         | periodontal abscess        | AEVC01             |
| <i>S. gordonii</i> (Challis substr CH1 ATCC 35105)      | human         | blood/endocarditis valve   | NC_009785          |
| <i>S. infantis</i> (ATCC 700779)                        | human         | tooth surface & pharynx    | AEVD01             |
| <i>S. intermedius</i> (F0413)                           | human         | dental plaque              | AFXO01             |
| <i>S. mitis</i> (B6)                                    | human         | blood                      | NC_013853          |
| <i>S. oralis</i> (Uo5)                                  | human         | oral cavity                | NC_015291          |
| <i>S. parasanguinis</i> (ATCC 15912)                    | human         | oral cavity                | NC_015678          |
| <i>S. peroris</i> (ATCC 700780)                         | human         | tooth surface & pharynx    | AEVF01             |
| <i>S. pneumoniae</i> (670 6B)                           | human         | nasopharyngeal             | NC_014498          |
| <i>S. pseudopneumoniae</i> (IS7493)                     | human         | sputum; HIV                | NC_015875          |
| <i>S. sanguinis</i> (SK36)                              | human         | dental plaque              | NC_009009          |
